# Supplementary material for: Rootstocks Overexpressing StNPR1 and StDREB1 Improve Osmotic Stress Tolerance of Wild-Type Scion in Transgrafted Tobacco Plants
Source: MDPI journal article supplement (doi:10.3390/ijms22168398), 2021-08-05
Supplement: s1 [file s1]

# Rootstocks Overexpressing *StNPR1* and *StDREB1* Improve Osmotic Stress Tolerance of Wild-Type Scion in Transgrafted Tobacco Plants

## Supplementary materials

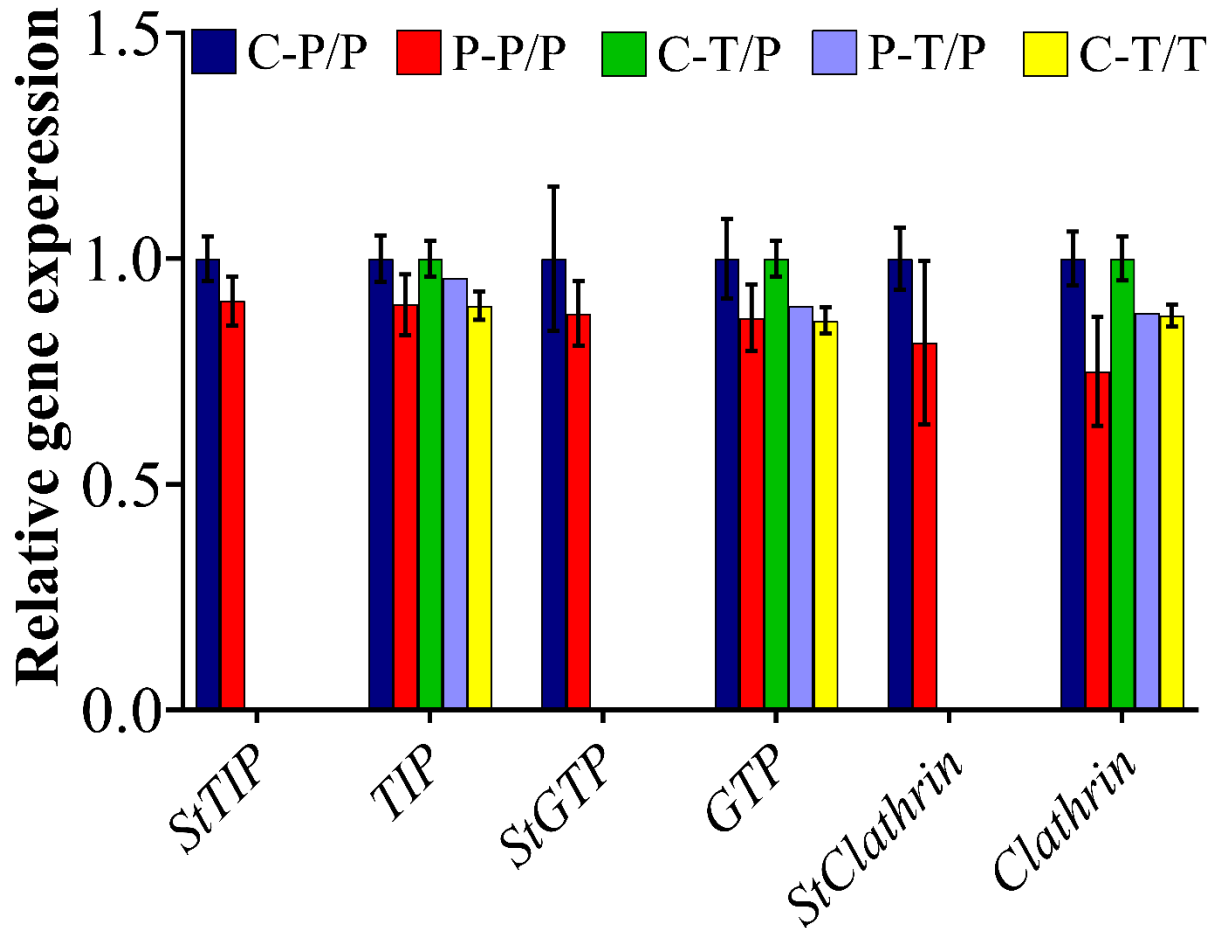

**Figure S1. Transport of housekeeping mRNAs from the potato rootstock to the tomato scion 6 h after exposure to osmotic stress.** Control-potato homograft (C-P/P), PEG-potato homograft (P-P/P), control-tomato/potato heterograft (C-T/P), PEG-tomato/potato heterograft (P-T/P) and control tomato homograft (C-T/T). The relative expression of potato genes in P-P/P was calculated relative to the control (C-P/P). The relative expression of tomato genes in tomato scions was calculated relative to the control (C-T/T). The values are the mean of three biological replicates. *StGTP* – *StTIP* – *StClathrin* are results of specific potato primers used to test the transport of the housekeeping genes' transcripts and *GTP* – *TIP* – *Clathrin* results of primers used to amplify both potato and tomato transcripts to select the most consistent reference gene.

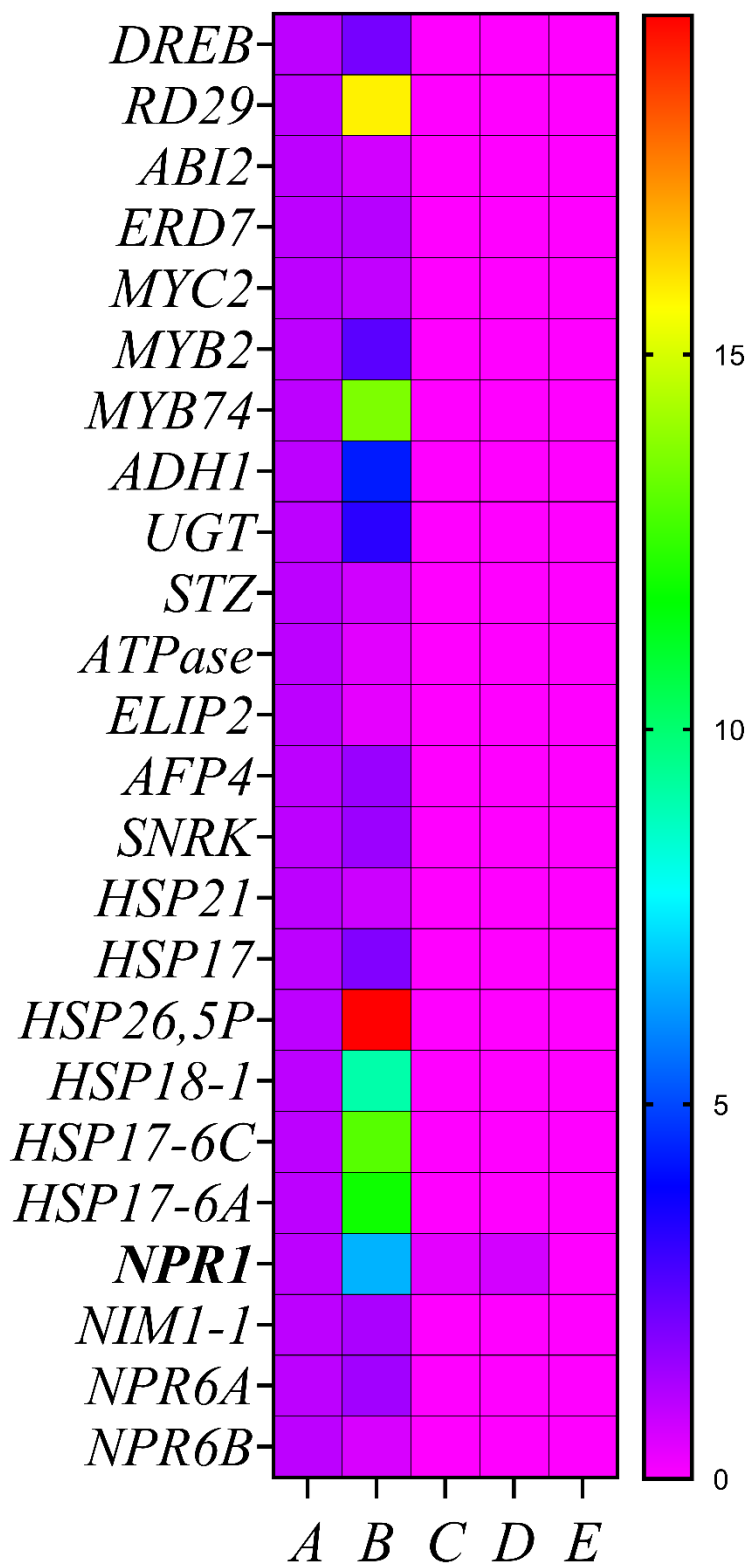

**Figure S2. Heat map shows the transport of ORG mRNAs from the potato rootstock to the tomato scion 6 h after exposure to osmotic stress, assessed by qRT-PCR.** Plants were osmotically stressed by watering with 30% PEG (6000) four weeks after graft establishment. Tissues samples located 5 cm above the graft union were collected from untreated plants (control) and 6 h of PEG-treated plants. A represents control-potato homograft (C-P/P), B represents PEG-potato homograft (P-P/P), C represents control-tomato/potato heterograft (C-T/P), D represents PEG-tomato/potato heterograft (P-T/P) and E represents control tomato homograft (C-T/T). The relative expression of potato genes was calculated relative to the control (C-P/P), and normalized to TIP. The bars show the normalized relative expression of potato ORG. Values were obtained from the means  $\pm$  SEM, n = 3. The purple color means that the transcripts were not detected in the scion of C, D and E for all tested ORG except for NPR1, potato transcripts were not detected in control tomato homograft only.

**Table S1. Sequence of primers used to assess expression of osmotic related genes in potato and tomato homo and heterografts.**

| Accession #                     | Gene Name                                   | Primer sequence       |
|---------------------------------|---------------------------------------------|-----------------------|
| <b>Primers used for qRT-PCR</b> |                                             |                       |
| PGSC0003DMT400068136            | <i>Vacuolar H<sup>+</sup>-ATPase A2 - F</i> | AAATGGGAAGGTGCTTGG    |
| PGSC0003DMT400068136            | <i>Vacuolar H<sup>+</sup>-ATPase A2 - R</i> | TCGAGGACAACAAATTCCAG  |
| PGSC0003DMT400037083            | <i>LTI65 - F</i>                            | GGGAAAAGTGATCAGGATGC  |
| PGSC0003DMT400037083            | <i>LTI65 - R</i>                            | TTTGAAGGGACGGACTCAA   |
| PGSC0003DMT40003201             | <i>DREB - F</i>                             | CCCCTGAAATGGCTGCAAG   |
| PGSC0003DMT40003201             | <i>DREB - R</i>                             | CGAGGCAACGATTCAACGA   |
| PGSC0003DMT400045204            | <i>MYC2 - F</i>                             | CGTCGAGGGCTTTGAATTA   |
| PGSC0003DMT400045204            | <i>MYC2 - R</i>                             | GGCGTACGTAGCTGCAAAT   |
| PGSC0003DMT400022600            | <i>MYB2 - F</i>                             | AGCTTTTGGGGAGAGAGACA  |
| PGSC0003DMT400022600            | <i>MYB2 - R</i>                             | TTAACCCAACCCAATTCCA   |
| PGSC0003DMT400057690            | <i>MYB 74 - F</i>                           | GTAACCAAATTCAAGCCCCTA |
| PGSC0003DMT400057690            | <i>MYB 74 -R</i>                            | AAATGTTGAACCATCGGATGT |
| PGSC0003DMT400066189            | <i>St-TIP4 1 -F</i>                         | CTTGGAAGAGGTTGCTGGT   |
| PGSC0003DMT400066189            | <i>St-TIP4 1 - R</i>                        | TGGGTTCTGTGTCGTTTCATT |
| PGSC0003DMT400052825            | <i>St-Clathrin - F</i>                      | GTTTGGAATGAGGCAAAG    |
| PGSC0003DMT400052825            | <i>St-Clathrin - R</i>                      | CATTTCAGGAACCAGACAA   |

|                      |                                  |                        |
|----------------------|----------------------------------|------------------------|
| PGSC0003DMT400023327 | <i>St-GTPase – F</i>             | TTCCCGTCTGGAAAAGATGG   |
| PGSC0003DMT400023327 | <i>St-GTPase – R</i>             | TGCTGAAGAAGAAGCGGATAA  |
| PGSC0003DMT400066189 | <i>Sl &amp; St-TIP4 1 -F</i>     | GTTGGGAGATCGAGTGTCTG   |
| PGSC0003DMT400066189 | <i>Sl &amp; St-TIP4 1 – R</i>    | CATCTCCGGCAAGTGAGTT    |
| PGSC0003DMT400052825 | <i>Sl &amp; St-Clathrin – F</i>  | TGCTTCCTTTCTGGAATGC    |
| PGSC0003DMT400052825 | <i>Sl &amp; St-Clathrin – R</i>  | GGACGGGACTTGAGTTGTG    |
| PGSC0003DMT400023327 | <i>Sl &amp; St-GTPase – F</i>    | AGCGACTGTTCCCTTCCTC    |
| PGSC0003DMT400023327 | <i>Sl &amp; St-GTPase – R</i>    | CCCAAGGTGATAACGCAAC    |
| PGSC0003DMT400037120 | <i>CRT binding factor 2A – F</i> | CTTCCGACCATCATCATCAGA  |
| PGSC0003DMT400037120 | <i>CRT binding factor 2A – R</i> | GGAGGAGGTAGCATGAGTCC   |
| PGSC0003DMT400061367 | <i>ERD7 – F</i>                  | CACTGAAC TTGTAAACTGGTA |
| PGSC0003DMT400061367 | <i>ERD7 – R</i>                  | AAACTATGACTGACGTGAAC   |
| PGSC0003DMT400002412 | <i>NPR1 – F</i>                  | TCCACCAGCTCACTCCTCTG   |
| PGSC0003DMT400002412 | <i>NPR1 – R</i>                  | ACAAATCACCAAAGCCACAA   |
| PGSC0003DMT400075333 | <i>ABI1B – F</i>                 | GGTTCTTGCTGTTGTGGCTA   |
| PGSC0003DMT400075333 | <i>ABI1B – R</i>                 | CGCCCCATTAATCAGGATAC   |
| PGSC0003DMT400045362 | <i>UGT73E2 – F</i>               | GACTAACAATGGGTGTTCTTA  |
| PGSC0003DMT400045362 | <i>UGT73E2 – R</i>               | AGTAATCGCGCAATGTCAA    |
| PGSC0003DMT400016494 | <i>ELIP2 – F</i>                 | GCCAAACCAAGTGATGGAA    |
| PGSC0003DMT400016494 | <i>ELIP2 – R</i>                 | AACCCAGAAGACTACGCTGT   |
| PGSC0003DMT400063937 | <i>ADH1 – F</i>                  | TGCGTATTTGGCATAATTGC   |
| PGSC0003DMT400063937 | <i>ADH1 – R</i>                  | GCACCGTCAGTATTGTGTGA   |
| PGSC0003DMT400008351 | <i>HSP21 – F</i>                 | AATACTCCATCCCAGTTCCAA  |
| PGSC0003DMT400008351 | <i>HSP21 – R</i>                 | AAGCAATCTTCACACTGGAG   |
| PGSC0003DMT400078007 | <i>HSP17,6 – F</i>               | AAGGAATTAGGCTTTCCAGGTT |
| PGSC0003DMT400078007 | <i>HSP17,6 – R</i>               | CCATTAAGCAGAAACAGAGCA  |
| PGSC0003DMT400055958 | <i>HSP17,6A – F</i>              | GAAGCTCCTCGAAACTTTCCT  |
| PGSC0003DMT400055958 | <i>HSP17,6A – R</i>              | CTTGATGTTGTGATTTTCGTG  |
| PGSC0003DMT400078007 | <i>HSP17,6C -+ F</i>             | CTTCAAGGAATTAGGCTTTCC  |

|                      |                     |                        |
|----------------------|---------------------|------------------------|
| PGSC0003DMT400078007 | <i>HSP17,6C – R</i> | GCAGAAACAGAGCAGACTCAAG |
| PGSC0003DMT400054660 | <i>NIM1-1 – F</i>   | ACACGTGGGTCCACTTTGT    |
| PGSC0003DMT400054660 | <i>NIM1-1 – R</i>   | GAACAACATTCATTCCAGTC   |
| PGSC0003DMT400021076 | <i>NPR6A – F</i>    | GGTGCAAATGTAGCAACGACT  |
| PGSC0003DMT400021076 | <i>NPR6A – R</i>    | TCAAAAAGGGGTAGAGGCAA   |
| PGSC0003DMT400027591 | <i>NPR6B – F</i>    | TCCATATTGCTCCACCCTCT   |
| PGSC0003DMT400027591 | <i>NPR6B – R</i>    | CGGCCCACAAAAGAATTTCC   |

#### Primers used for RT- PCR

|                      |                        |                     |
|----------------------|------------------------|---------------------|
| PGSC0003DMT400002412 | <i>RT-PCR-NPR1-F</i>   | GGATTTGCTTTGCTTGCTG |
| PGSC0003DMT400002412 | <i>RT-PCR-NPR1-R</i>   | ACCTCGACCGGATCATTG  |
| PGSC0003DMT400060953 | <i>RT-PCR-Actin2-F</i> | GGCAGAAGGTGAGGATATT |
| PGSC0003DMT400060953 | <i>RT-PCR-Actin2-R</i> | TGTGGTGGTGAAAGAGTAG |

**Table S2. Sequence of used primers in tobacco experiment.**

| Primers used for qRTPCR |                |                          |
|-------------------------|----------------|--------------------------|
| Accession #             | Gene Name      | Forward primer           |
| AF234297.1              | <i>GUS-F</i>   | GCTGATAGCGCGTGACAAA      |
| AF234297.1              | <i>GUS-R</i>   | CGCGAAATATTCCCGTGCA      |
| NM_001326165.1          | <i>NtEF1-F</i> | GGACGTTTTGCTGTGAGGG      |
| NM_001326165.1          | <i>NtEF1-R</i> | GTGACCTTGGCACCAGTTG      |
| EU580435.1              | <i>NtSOD-F</i> | AGCTACATGACGCCATTTCC     |
| EU580435.1              | <i>NtSOD-R</i> | CCCTGTAAAGCAGCACCTTC     |
| U07627.1                | <i>NtCAT-F</i> | TGCCATTGATGCCAGTTGG      |
| U07627.1                | <i>NtCAT-R</i> | CAGGGTTAAACGCGAGCTG      |
| <i>D85912</i>           | <i>NtAPX-F</i> | CAAATGTAAGAGGAACTCAGAGGA |
| <i>D85912</i>           | <i>NtAPX-R</i> | CAGCCTTGAGCCTCATGGTACCG  |
| JX682668.1              | <i>NtERF-F</i> | TTGGCACCTTTGACACTGC      |
| JX682668.1              | <i>NtERF-R</i> | GATGGGGGAAGTTGAGCCT      |

|                                 |                  |                      |
|---------------------------------|------------------|----------------------|
| GU144573.1                      | <i>NtERD1-F</i>  | GGTGTCAATGGAATTCCGCA |
| GU144573.1                      | <i>NtERD1-R</i>  | ACGGGGGATCTTGGTGAAC  |
| HE653924.1                      | <i>NtMYC-F</i>   | ATGGGGTGCAGATGACCAA  |
| HE653924.1                      | <i>NtMYC-R</i>   | GGCAGGGCTTTGGTGTTAC  |
| AB689673.1                      | <i>NtHSP70-F</i> | GACTGTGTTGATCCCCGA   |
| AB689673.1                      | <i>NtHSP70-R</i> | CAGGCTGGTTGTCCGAGTA  |
| AB006042.1                      | <i>NtHSP26-F</i> | CAGGAAGCAACAGGGCATC  |
| AB006042.1                      | <i>NtHSP26-R</i> | CGGCATGTCAAAACGCATC  |
| <b>Primers used for RT- PCR</b> |                  |                      |
| PGSC0003DMT400002412            | <i>StNPR1-F</i>  | GGATTTGCTTTGCTTGCTG  |
| PGSC0003DMT400002412            | <i>StNPR1-R</i>  | ACCTCGACCGGATCATTG   |
| PGSC0003DMT40003201             | <i>StDREB1-F</i> | TCGAATGCGAAGTTGGGGA  |
| PGSC0003DMT40003201             | <i>StDREB1-R</i> | AACCCATCCTTCACCGGAG  |
| AF234297.1                      | <i>GUS-F</i>     | CAACGTCTGGTATCAGCGC  |
| AF234297.1                      | <i>GUS-R</i>     | GCGGATTCACCACTTGCAA  |
| AB158612.1                      | <i>NtActin-F</i> | TACGCCCTTCCTCATGCAA  |
| AB158612.1                      | <i>NtActin-R</i> | ACGATCTGCAATGCCAGGA  |
